# Supplementary material for: Metabolomics for the early detection of cisplatin-induced nephrotoxicity
Source: Royal Society of Chemistry journal article supplement (doi:10.1039/c7tx00171a), 2017-01-01
Supplement: c7tx00171a2.pdf [file c7tx00171a2.pdf]

**Supplemental Table 2. Biochemical examination of rats treated with cisplatin**

| Name | time  | Mean  |       |       | S.E.  |       |       | P value          |                  |
|------|-------|-------|-------|-------|-------|-------|-------|------------------|------------------|
|      |       | Non   | Low   | High  | Non   | Low   | High  | Low vs Non       | High vs Non      |
| CRE  | 24 hr | 0.149 | 0.16  | 0.186 | 0.005 | 0.002 | 0.005 | 0.102            | <b>&lt;0.001</b> |
|      | 48 hr | 0.151 | 0.289 | 0.375 | 0.005 | 0.019 | 0.020 | <b>&lt;0.001</b> | <b>&lt;0.001</b> |
|      | 96 hr | 0.164 | 2.162 | 4.288 | 0.005 | 0.221 | 0.225 | <b>&lt;0.001</b> | <b>&lt;0.001</b> |
| BUN  | 24 hr | 12.73 | 12.66 | 13.71 | 0.419 | 0.441 | 0.578 | 0.914            | 0.209            |
|      | 48 hr | 12.20 | 20.78 | 31.35 | 0.513 | 1.336 | 1.337 | <b>&lt;0.001</b> | <b>&lt;0.001</b> |
|      | 96 hr | 10.82 | 78.78 | 272.8 | 0.476 | 10.12 | 7.636 | <b>&lt;0.001</b> | <b>&lt;0.001</b> |
| TP   | 24 hr | 5.970 | 6.080 | 5.918 | 0.091 | 0.081 | 0.081 | 0.402            | 0.690            |
|      | 48 hr | 5.900 | 5.880 | 6.418 | 0.079 | 0.099 | 0.083 | 0.882            | <b>&lt;0.001</b> |
|      | 96 hr | 5.320 | 5.400 | 5.964 | 0.068 | 0.099 | 0.109 | 0.536            | <b>&lt;0.001</b> |
| ALB  | 24 hr | 4.110 | 4.320 | 4.236 | 0.064 | 0.031 | 0.068 | <b>0.015</b>     | 0.215            |
|      | 48 hr | 4.120 | 4.180 | 4.482 | 0.046 | 0.053 | 0.071 | 0.428            | <b>&lt;0.001</b> |
|      | 96 hr | 3.780 | 3.660 | 3.836 | 0.044 | 0.057 | 0.059 | 0.133            | 0.478            |

The plasma levels of CRE, BUN, TP and ALB of rats at 24 hr, 48 hr, and 96 hr after cisplatin administration were measured. P values were calculated by the Welch's t-test. In the column of 'P value', the bold letters show  $P < 0.05$ .

**Abbreviations:** Non, non-treatment group; Low, low-dose group; High, high-dose group; CRE, creatinine; BUN, blood urea nitrogen; TP, total protein; ALB, albumin.
