# Supplementary material for: Metabolomics for the early detection of cisplatin-induced nephrotoxicity
Source: Royal Society of Chemistry journal article supplement (doi:10.1039/c7tx00171a), 2017-01-01
Supplement: c7tx00171a4.pdf [file c7tx00171a4.pdf]

**Supplemental Table 4. The changes of kidney metabolite profiles**

**A**

| Name                          | Mean |     |      | S.E. |      |      | Fold-change |              | P-value          |                   |
|-------------------------------|------|-----|------|------|------|------|-------------|--------------|------------------|-------------------|
|                               | Non  | Low | High | Non  | Low  | High | Low/<br>Non | High/<br>Non | Low<br>vs<br>Non | High<br>vs<br>Non |
| 1,5-Anhydro-D-glucitol        | 26   | 23  | 8.2  | 5.7  | 3.6  | 1.9  | 0.64        | 0.34         | 0.7              | <b>0.018</b>      |
| 1-Methyl uracil               | 9.5  | 7.4 | 3.7  | 0.83 | 0.9  | 0.71 | 1.1         | 0.85         | 0.12             | <b>&lt;0.001</b>  |
| 2-Aminoethanol                | 1.6  | 1.4 | 170  | 0.15 | 0.29 | 63   | 1.9         | 410          | 0.62             | <b>0.03</b>       |
| 2-Aminoisobutyrate            | 13   | 13  | 9.3  | 0.91 | 2.1  | 1.4  | 2.3         | 1.6          | 0.76             | <b>0.036</b>      |
| 2-Dehydro-D-gluconate_1       | 3.9  | 4.6 | 2.9  | 0.44 | 0.81 | 0.51 | 1.8         | 1.2          | 0.45             | 0.17              |
| 3-Hydroxypyruvate             | 610  | 540 | 710  | 61   | 94   | 120  | 1.5         | 2            | 0.57             | 0.47              |
| 3-Pyridylacetic acid          | 86   | 63  | 36   | 5.2  | 8.2  | 5.9  | 1.6         | 1.1          | <b>0.037</b>     | <b>&lt;0.001</b>  |
| 5-Aminovaleric acid           | 3    | 1.9 | 1.2  | 0.36 | 0.31 | 0.18 | 0.86        | 0.5          | <b>0.034</b>     | <b>&lt;0.001</b>  |
| 5-Hydroxyindoleacetate        | 1.1  | 1.8 | 1.2  | 0.27 | 0.45 | 0.3  | 1.6         | 1.1          | 0.23             | 0.88              |
| Adenylosuccinic acid          | 1.1  | 1.4 | 0.52 | 0.18 | 0.28 | 0.09 | 1.6         | 0.51         | 0.56             | <b>0.0097</b>     |
| Anthracene                    | 1.9  | 1.7 | 1    | 0.11 | 0.21 | 0.17 | 1.8         | 1.5          | 0.4              | <b>&lt;0.001</b>  |
| Arabinose-5-phosphate         | 2    | 2.7 | 0.98 | 0.37 | 0.43 | 0.14 | 1.2         | 0.38         | 0.27             | <b>0.034</b>      |
| α-Sorbopyranose (or Fructose) | 39   | 42  | 40   | 5.1  | 9.1  | 5.8  | 1.8         | 1.1          | 0.77             | 0.83              |
| Cadaverine                    | 8.8  | 12  | 2.6  | 2.4  | 2.5  | 0.45 | 1           | 0.19         | 0.38             | 0.037             |
| Citric acid + Isocitric acid  | 1.8  | 1.1 | 0.99 | 0.5  | 0.27 | 0.43 | 0.55        | 0.86         | 0.27             | 0.28              |
| Coniferyl alcohol             | 340  | 200 | 320  | 38   | 33   | 97   | 0.88        | 2.6          | <b>0.014</b>     | 0.86              |

|                             |       |       |       |       |      |      |      |       |                  |                  |
|-----------------------------|-------|-------|-------|-------|------|------|------|-------|------------------|------------------|
| Coniferyl aldehyde          | 130   | 71    | 4.8   | 20    | 14   | 0.69 | 0.7  | 0.034 | <b>0.03</b>      | <b>&lt;0.001</b> |
| Cysteine+Cystine            | 15    | 7.1   | 3.8   | 3.1   | 1.3  | 0.54 | 0.43 | 0.18  | <b>0.043</b>     | <b>0.0072</b>    |
| Dihydroxyacetone            | 3.6   | 3.3   | 1.8   | 0.47  | 0.47 | 0.41 | 1    | 0.88  | 0.66             | <b>0.016</b>     |
| Ethionine                   | 6     | 5.1   | 3.2   | 0.41  | 0.74 | 0.96 | 1.8  | 2.3   | 0.34             | <b>0.022</b>     |
| Fructose                    | 110   | 25    | 17    | 10    | 4    | 2.9  | 0.4  | 0.29  | <b>&lt;0.001</b> | <b>&lt;0.001</b> |
| Galactitol                  | 2000  | 2400  | 2500  | 250   | 340  | 470  | 1.4  | 1.9   | 0.41             | 0.33             |
| Galactosamine               | 17    | 21    | 11    | 2.4   | 2.5  | 1.9  | 1.1  | 0.78  | 0.3              | 0.063            |
| Galactose                   | 100   | 75    | 28    | 11    | 9.5  | 5.7  | 0.84 | 0.5   | 0.12             | <b>&lt;0.001</b> |
| Galacturonic acid           | 3.9   | 2.5   | 2.2   | 0.55  | 0.28 | 0.41 | 0.5  | 0.75  | <b>0.048</b>     | <b>0.03</b>      |
| $\gamma$ -Glutamyl cysteine | 1     | 1     | 0.86  | 0.057 | 0.23 | 0.26 | 4    | 4.4   | 0.95             | 0.56             |
| Glucosamine                 | 2800  | 3400  | 3600  | 360   | 480  | 650  | 1.4  | 1.8   | 0.42             | 0.37             |
| Glucosamine-6-Phosphate     | 2.1   | 3.2   | 2.1   | 0.23  | 1.2  | 0.53 | 5.2  | 2.3   | 0.43             | 0.98             |
| Glucose                     | 13000 | 14000 | 11000 | 1400  | 1900 | 1900 | 1.4  | 1.4   | 0.69             | 0.46             |
| Heptanedioate               | 5.3   | 3.6   | 3.3   | 0.86  | 0.44 | 0.67 | 0.51 | 0.78  | 0.1              | 0.087            |
| Kynurenate                  | 2.2   | 1.2   | 1.4   | 0.79  | 0.15 | 0.63 | 0.19 | 0.81  | 0.28             | 0.49             |
| Kynurenine                  | 43    | 33    | 32    | 7     | 4.7  | 6.9  | 0.67 | 0.98  | 0.31             | 0.33             |
| Maleamic acid               | 9.3   | 11    | 7.1   | 0.71  | 2    | 1.6  | 2.8  | 2.2   | 0.36             | 0.27             |
| Maltose                     | 5.4   | 7.2   | 4.6   | 0.77  | 1.4  | 0.88 | 1.8  | 1.1   | 0.29             | 0.54             |
| Melibiose                   | 12    | 5.6   | 4.4   | 3.2   | 0.46 | 0.8  | 0.14 | 0.25  | 0.083            | <b>0.048</b>     |
| Methionine sulfone          | 69    | 21    | 5.6   | 8.8   | 4.5  | 1.6  | 0.51 | 0.18  | <b>&lt;0.001</b> | <b>&lt;0.001</b> |
| N-Acetyl-DL-valine          | 69    | 56    | 59    | 13    | 4.5  | 9.4  | 0.34 | 0.7   | 0.41             | 0.58             |
| N-Acetyl-L-glutamate        | 6.6   | 5.7   | 3.1   | 0.78  | 0.82 | 0.54 | 1.1  | 0.7   | 0.48             | <b>0.0032</b>    |
| p-Coumaric acid             | 7.1   | 4.4   | 2.8   | 1.3   | 0.96 | 0.47 | 0.74 | 0.36  | 0.14             | <b>0.013</b>     |

|              |     |     |     |      |      |      |     |      |               |                  |
|--------------|-----|-----|-----|------|------|------|-----|------|---------------|------------------|
| Phosphate    | 1.4 | 1.6 | 1.3 | 0.14 | 0.39 | 0.3  | 2.7 | 2.1  | 0.65          | 0.8              |
| Psicose      | 11  | 29  | 11  | 2.7  | 5.6  | 2.6  | 2.1 | 0.94 | <b>0.016</b>  | 0.92             |
| Ribitol      | 460 | 190 | 91  | 73   | 29   | 17   | 0.4 | 0.23 | <b>0.0068</b> | <b>&lt;0.001</b> |
| Thymine      | 2.5 | 2.3 | 1.3 | 0.39 | 0.47 | 0.26 | 1.2 | 0.65 | 0.69          | <b>0.023</b>     |
| Valine(2TMS) | 3.6 | 2.1 | 1.7 | 0.36 | 0.38 | 0.4  | 1.1 | 1.1  | <b>0.016</b>  | <b>0.0031</b>    |

**B**

| Name                     | Mean  |       |       | S.E.   |        |        | Fold-change |          | P-value       |                  |
|--------------------------|-------|-------|-------|--------|--------|--------|-------------|----------|---------------|------------------|
|                          | Non   | Low   | High  | Non    | Low    | High   | Low/Non     | High/Non | Low vs Non    | High vs Non      |
| AC 16:0                  | 0.14  | 0.086 | 0.11  | 0.045  | 0.027  | 0.033  | 0.61        | 0.77     | <b>0.022</b>  | 0.18             |
| AC 18:0                  | 0.25  | 0.19  | 0.21  | 0.079  | 0.059  | 0.065  | 0.75        | 0.86     | <b>0.0094</b> | 0.26             |
| AC 18:1                  | 0.072 | 0.027 | 0.039 | 0.023  | 0.0086 | 0.012  | 0.38        | 0.55     | 0.067         | 0.17             |
| AC 18:2                  | 0.043 | 0.014 | 0.021 | 0.013  | 0.0045 | 0.0063 | 0.33        | 0.49     | <b>0.0022</b> | <b>0.018</b>     |
| FA 12:0                  | 0.012 | 0.009 | 0.018 | 0.0036 | 0.0029 | 0.0055 | 0.78        | 1.6      | 0.5           | 0.057            |
| FA 14:0                  | 0.35  | 0.4   | 0.58  | 0.11   | 0.13   | 0.18   | 1.1         | 1.7      | 0.79          | 0.12             |
| FA 14:1(n-5)             | 0.033 | 0.031 | 0.048 | 0.01   | 0.0099 | 0.015  | 0.94        | 1.5      | 0.9           | 0.27             |
| FA 15:0                  | 0.028 | 0.036 | 0.039 | 0.009  | 0.012  | 0.012  | 1.3         | 1.4      | 0.056         | <b>0.017</b>     |
| FA 16:0                  | 21    | 26    | 32    | 6.6    | 8.1    | 9.6    | 1.2         | 1.5      | 0.16          | <b>0.0031</b>    |
| FA 16:1(n-7)             | 1.3   | 1.4   | 2.2   | 0.42   | 0.45   | 0.67   | 1.1         | 1.7      | 0.85          | 0.13             |
| FA 17:0                  | 0.23  | 0.32  | 0.33  | 0.072  | 0.1    | 0.098  | 1.4         | 1.4      | <b>0.012</b>  | <b>0.0079</b>    |
| FA 17:1(n-7)             | 0.14  | 0.18  | 0.24  | 0.043  | 0.056  | 0.074  | 1.3         | 1.8      | 0.22          | <b>&lt;0.001</b> |
| FA 18:1(n-9)c/18:1(n-7)c | 7.1   | 9.9   | 14    | 2.3    | 3.1    | 4.3    | 1.4         | 2        | 0.21          | <b>&lt;0.001</b> |
| FA 18:2(n-6)             | 11    | 14    | 18    | 3.5    | 4.5    | 5.5    | 1.3         | 1.7      | 0.26          | <b>0.0012</b>    |

|                        |        |        |       |        |        |        |      |     |                  |                  |
|------------------------|--------|--------|-------|--------|--------|--------|------|-----|------------------|------------------|
| FA 18:3(n-3)/18:3(n-6) | 0.57   | 0.85   | 1.2   | 0.18   | 0.27   | 0.36   | 1.5  | 2.1 | 0.18             | <b>0.0031</b>    |
| FA 18:4(n-3)           | 0.035  | 0.045  | 0.069 | 0.011  | 0.014  | 0.021  | 1.3  | 2   | 0.13             | <b>0.0028</b>    |
| FA 19:0                | 0.041  | 0.06   | 0.082 | 0.013  | 0.019  | 0.025  | 1.5  | 2   | <b>0.036</b>     | <b>&lt;0.001</b> |
| FA 20:0                | 0.44   | 0.82   | 1.7   | 0.14   | 0.26   | 0.51   | 1.9  | 3.9 | <b>0.0012</b>    | <b>&lt;0.001</b> |
| FA 20:1(n-9)           | 1.1    | 2.4    | 3.6   | 0.34   | 0.77   | 1.1    | 2.3  | 3.4 | <b>0.012</b>     | <b>&lt;0.001</b> |
| FA 20:3(n-6)/20:3(n-9) | 2      | 2.6    | 3.2   | 0.62   | 0.81   | 0.95   | 1.3  | 1.6 | <b>0.0075</b>    | <b>0.0012</b>    |
| FA 20:4(n-6)           | 17     | 25     | 35    | 5.5    | 7.8    | 11     | 1.4  | 2   | <b>0.0015</b>    | <b>&lt;0.001</b> |
| FA 20:5(n-3)           | 0.75   | 0.85   | 1     | 0.24   | 0.27   | 0.31   | 1.1  | 1.4 | 0.38             | <b>0.035</b>     |
| FA 21:0                | 0.045  | 0.082  | 0.11  | 0.014  | 0.026  | 0.034  | 1.8  | 2.5 | <b>0.007</b>     | <b>&lt;0.001</b> |
| FA 22:0                | 0.46   | 0.81   | 1.5   | 0.15   | 0.26   | 0.45   | 1.7  | 3.2 | <b>&lt;0.001</b> | <b>&lt;0.001</b> |
| FA 22:1(n-9)           | 0.15   | 0.35   | 0.53  | 0.049  | 0.11   | 0.16   | 2.2  | 3.5 | <b>0.0014</b>    | <b>&lt;0.001</b> |
| FA 22:4(n-6)           | 1.9    | 4.6    | 8.5   | 0.6    | 1.4    | 2.6    | 2.4  | 4.5 | <b>&lt;0.001</b> | <b>&lt;0.001</b> |
| FA 22:5(n-6)           | 2.3    | 3.8    | 6.5   | 0.71   | 1.2    | 1.9    | 1.7  | 2.9 | <b>0.0028</b>    | <b>&lt;0.001</b> |
| FA 22:6(n-3)           | 2.3    | 3.1    | 4.9   | 0.73   | 0.98   | 1.5    | 1.3  | 2.1 | <b>0.01</b>      | <b>&lt;0.001</b> |
| FA 23:0                | 0.19   | 0.27   | 0.36  | 0.061  | 0.086  | 0.11   | 1.4  | 1.9 | <b>0.0091</b>    | <b>&lt;0.001</b> |
| FA 24:0                | 1.7    | 2.6    | 3.4   | 0.55   | 0.83   | 1      | 1.5  | 1.9 | <b>&lt;0.001</b> | <b>0.0064</b>    |
| FA 24:1(n-9)           | 1.2    | 2.4    | 2.8   | 0.38   | 0.75   | 0.84   | 1.9  | 2.3 | <b>&lt;0.001</b> | <b>0.0015</b>    |
| FA 25:0                | 0.11   | 0.15   | 0.17  | 0.036  | 0.047  | 0.052  | 1.3  | 1.5 | <b>0.023</b>     | <b>0.0032</b>    |
| FA 26:0                | 0.21   | 0.24   | 0.23  | 0.066  | 0.075  | 0.07   | 1.1  | 1.1 | 0.11             | 0.33             |
| FA 20:2(n-6)           | 1.4    | 2.6    | 4.2   | 0.43   | 0.83   | 1.3    | 1.9  | 3.1 | <b>&lt;0.001</b> | <b>&lt;0.001</b> |
| LPC 14:0 (sn-1)        | 0.0082 | 0.0084 | 0.019 | 0.0026 | 0.0027 | 0.0058 | 1    | 2.4 | 0.9              | <b>0.0095</b>    |
| LPC 14:0 (sn-2)        | 0.022  | 0.021  | 0.055 | 0.007  | 0.0068 | 0.016  | 0.96 | 2.5 | 0.87             | <b>&lt;0.001</b> |
| LPC 15 0 (sn-1)        | 0.011  | 0.013  | 0.022 | 0.0035 | 0.0042 | 0.0067 | 1.2  | 2   | 0.4              | <b>0.0045</b>    |

|                 |        |        |       |        |        |        |      |     |               |                  |
|-----------------|--------|--------|-------|--------|--------|--------|------|-----|---------------|------------------|
| LPC 15:0 (sn-2) | 0.035  | 0.037  | 0.056 | 0.011  | 0.012  | 0.017  | 1.1  | 1.6 | 0.71          | <b>0.015</b>     |
| LPC 16:0 (sn-1) | 2      | 2.4    | 5.4   | 0.63   | 0.76   | 1.6    | 1.2  | 2.7 | 0.37          | <b>&lt;0.001</b> |
| LPC 16:0 (sn-2) | 5.8    | 6      | 12    | 1.8    | 1.9    | 3.7    | 1    | 2.1 | 0.81          | <b>&lt;0.001</b> |
| LPC 16:0e       | 0.0099 | 0.016  | 0.053 | 0.0031 | 0.0052 | 0.016  | 1.7  | 5.3 | <b>0.02</b>   | <b>&lt;0.001</b> |
| LPC 16:0p       | 0.022  | 0.05   | 0.14  | 0.0068 | 0.016  | 0.042  | 2.3  | 6.4 | <b>0.0074</b> | <b>&lt;0.001</b> |
| LPC 16:1 (sn-1) | 0.041  | 0.042  | 0.081 | 0.013  | 0.013  | 0.024  | 1    | 2   | 0.92          | <b>0.02</b>      |
| LPC 16:1 (sn-2) | 0.05   | 0.055  | 0.13  | 0.016  | 0.017  | 0.04   | 1.1  | 2.7 | 0.69          | <b>&lt;0.001</b> |
| LPC 17:0 (sn-1) | 0.038  | 0.044  | 0.064 | 0.012  | 0.014  | 0.019  | 1.2  | 1.7 | 0.45          | <b>0.018</b>     |
| LPC 17:0 (sn-2) | 0.096  | 0.11   | 0.22  | 0.031  | 0.035  | 0.066  | 1.1  | 2.3 | 0.55          | <b>0.0023</b>    |
| LPC 17:1 (sn-2) | 0.0045 | 0.0054 | 0.014 | 0.0014 | 0.0017 | 0.0044 | 1.2  | 3.2 | 0.66          | <b>&lt;0.001</b> |
| LPC 18:0 (sn-1) | 0.76   | 0.81   | 1.8   | 0.24   | 0.26   | 0.55   | 1.1  | 2.4 | 0.71          | <b>&lt;0.001</b> |
| LPC 18:0 (sn-2) | 4.2    | 5      | 10    | 1.3    | 1.6    | 3.1    | 1.2  | 2.4 | 0.34          | <b>&lt;0.001</b> |
| LPC 18:1 (sn-1) | 1.4    | 1.2    | 2.5   | 0.43   | 0.37   | 0.76   | 0.86 | 1.9 | 0.71          | <b>0.049</b>     |
| LPC 18:1 (sn-2) | 0.97   | 1.1    | 2.6   | 0.31   | 0.34   | 0.79   | 1.1  | 2.7 | 0.71          | <b>&lt;0.001</b> |
| LPC 18:2 (sn-1) | 1.5    | 1.8    | 3     | 0.46   | 0.58   | 0.9    | 1.3  | 2   | 0.64          | <b>0.0054</b>    |
| LPC 18:2 (sn-2) | 0.47   | 0.5    | 1.1   | 0.15   | 0.16   | 0.32   | 1.1  | 2.3 | 0.87          | <b>0.0025</b>    |
| LPC 19:0 (sn-1) | 0.021  | 0.027  | 0.026 | 0.0068 | 0.0085 | 0.0078 | 1.3  | 1.2 | 0.26          | 0.28             |
| LPC 19:0 (sn-2) | 0.031  | 0.033  | 0.058 | 0.0098 | 0.01   | 0.018  | 1.1  | 1.9 | 0.81          | <b>0.021</b>     |
| LPC 20:0 (sn-1) | 0.022  | 0.018  | 0.024 | 0.0071 | 0.0056 | 0.0074 | 0.79 | 1.1 | 0.31          | 0.67             |
| LPC 20:0 (sn-2) | 0.13   | 0.097  | 0.19  | 0.04   | 0.031  | 0.057  | 0.76 | 1.5 | 0.43          | 0.17             |
| LPC 20:1 (sn-1) | 0.024  | 0.025  | 0.035 | 0.0074 | 0.0078 | 0.011  | 1    | 1.5 | 0.9           | 0.089            |
| LPC 20:1 (sn-2) | 0.083  | 0.089  | 0.2   | 0.026  | 0.028  | 0.06   | 1.1  | 2.4 | 0.85          | <b>0.0072</b>    |
| LPC 20:2 (sn-1) | 0.049  | 0.06   | 0.094 | 0.015  | 0.019  | 0.028  | 1.2  | 1.9 | 0.62          | <b>0.015</b>     |

|                 |        |        |        |        |        |        |      |      |                  |                  |
|-----------------|--------|--------|--------|--------|--------|--------|------|------|------------------|------------------|
| LPC 20:2 (sn-2) | 0.054  | 0.06   | 0.14   | 0.017  | 0.019  | 0.042  | 1.1  | 2.6  | 0.77             | <b>0.0048</b>    |
| LPC 20:3 (sn-1) | 0.17   | 0.17   | 0.24   | 0.054  | 0.052  | 0.072  | 0.97 | 1.4  | 0.95             | 0.16             |
| LPC 20:3 (sn-2) | 0.032  | 0.029  | 0.056  | 0.01   | 0.0092 | 0.017  | 0.92 | 1.8  | 0.77             | <b>0.011</b>     |
| LPC 20:4 (sn-1) | 2.2    | 2.8    | 4.5    | 0.7    | 0.88   | 1.4    | 1.3  | 2    | 0.6              | <b>0.0054</b>    |
| LPC 20:5 (sn-1) | 0.046  | 0.04   | 0.06   | 0.015  | 0.013  | 0.018  | 0.86 | 1.3  | 0.74             | 0.26             |
| LPC 22:0 (sn-1) | 0.0097 | 0.0069 | 0.0083 | 0.0031 | 0.0022 | 0.0025 | 0.71 | 0.85 | 0.05             | 0.34             |
| LPC 22:0 (sn-2) | 0.023  | 0.017  | 0.03   | 0.0073 | 0.0054 | 0.0091 | 0.73 | 1.3  | 0.11             | 0.17             |
| LPC 22:4 (sn-1) | 0.056  | 0.093  | 0.21   | 0.018  | 0.029  | 0.065  | 1.7  | 3.9  | 0.17             | <b>&lt;0.001</b> |
| LPC 22:4 (sn-2) | 0.014  | 0.017  | 0.058  | 0.0045 | 0.0053 | 0.018  | 1.2  | 4.1  | 0.74             | <b>&lt;0.001</b> |
| LPC 22:6 (sn-1) | 0.4    | 0.63   | 0.77   | 0.13   | 0.2    | 0.23   | 1.6  | 1.9  | 0.55             | <b>0.019</b>     |
| LPE 16:0 (sn-1) | 0.38   | 0.55   | 1.7    | 0.12   | 0.18   | 0.52   | 1.5  | 4.6  | 0.055            | <b>&lt;0.001</b> |
| LPE 16:0 (sn-2) | 0.89   | 1.2    | 2.9    | 0.28   | 0.39   | 0.89   | 1.4  | 3.3  | <b>0.02</b>      | <b>&lt;0.001</b> |
| LPE 17:0 (sn-1) | 0.017  | 0.03   | 0.064  | 0.0052 | 0.0096 | 0.019  | 1.8  | 3.9  | <b>&lt;0.001</b> | <b>&lt;0.001</b> |
| LPE 17:0 (sn-2) | 0.081  | 0.12   | 0.32   | 0.025  | 0.039  | 0.096  | 1.5  | 3.9  | 0.052            | <b>&lt;0.001</b> |
| LPE 18:0 (sn-1) | 1.9    | 3      | 7.6    | 0.61   | 0.95   | 2.3    | 1.6  | 4    | <b>0.019</b>     | <b>&lt;0.001</b> |
| LPE 18:0 (sn-2) | 4.4    | 6.3    | 14     | 1.4    | 2      | 4.1    | 1.4  | 3.1  | <b>0.0053</b>    | <b>&lt;0.001</b> |
| LPE 18:1 (sn-1) | 0.55   | 0.59   | 1.3    | 0.17   | 0.19   | 0.41   | 1.1  | 2.4  | 0.76             | <b>&lt;0.001</b> |
| LPE 18:1 (sn-2) | 1.2    | 1.5    | 4.4    | 0.37   | 0.49   | 1.3    | 1.3  | 3.8  | 0.22             | <b>&lt;0.001</b> |
| LPE 18:2 (sn-1) | 0.38   | 0.36   | 0.52   | 0.12   | 0.11   | 0.16   | 0.95 | 1.4  | 0.84             | 0.077            |
| LPE 18:2 (sn-2) | 0.17   | 0.21   | 0.6    | 0.054  | 0.067  | 0.18   | 1.2  | 3.5  | 0.43             | <b>&lt;0.001</b> |
| LPE 20:0 (sn-1) | 0.016  | 0.02   | 0.071  | 0.005  | 0.0065 | 0.021  | 1.3  | 4.5  | 0.37             | <b>&lt;0.001</b> |
| LPE 20:0 (sn-2) | 0.066  | 0.083  | 0.28   | 0.021  | 0.026  | 0.085  | 1.3  | 4.3  | 0.45             | <b>&lt;0.001</b> |
| LPE 20:1 (sn-1) | 0.0074 | 0.0098 | 0.016  | 0.0023 | 0.0031 | 0.005  | 1.3  | 2.2  | 0.22             | <b>&lt;0.001</b> |

|                                   |        |       |       |        |        |        |      |      |                  |                  |
|-----------------------------------|--------|-------|-------|--------|--------|--------|------|------|------------------|------------------|
| LPE 20:1 (sn-2)                   | 0.043  | 0.07  | 0.21  | 0.013  | 0.022  | 0.063  | 1.6  | 4.9  | 0.14             | <b>&lt;0.001</b> |
| LPE 20:3 (sn-1)                   | 0.049  | 0.054 | 0.066 | 0.016  | 0.017  | 0.02   | 1.1  | 1.4  | 0.8              | 0.12             |
| LPE 20:3 (sn-2)                   | 0.0067 | 0.01  | 0.018 | 0.0021 | 0.0032 | 0.0054 | 1.5  | 2.7  | 0.26             | <b>&lt;0.001</b> |
| LPE 20:4 (sn-1)                   | 1.4    | 1.3   | 1.8   | 0.43   | 0.43   | 0.55   | 0.99 | 1.3  | 0.96             | <b>0.047</b>     |
| LPE 20:5 (sn-1)                   | 0.026  | 0.025 | 0.018 | 0.0082 | 0.0081 | 0.0055 | 0.98 | 0.71 | 0.96             | 0.093            |
| LPE 22:6 (sn-1)                   | 0.11   | 0.19  | 0.19  | 0.034  | 0.06   | 0.057  | 1.8  | 1.8  | 0.44             | <b>0.037</b>     |
| PC 14:0-16:1                      | 42     | 42    | 43    | 13     | 13     | 13     | 1    | 1    | 0.93             | 0.52             |
| PC 14:0/18:2/16:1-16:1            | 4.5    | 5     | 4.6   | 1.4    | 1.6    | 1.4    | 1.1  | 1    | 0.21             | 0.77             |
| PC 14:0-20:3                      | 2.7    | 3.8   | 3     | 0.87   | 1.2    | 0.9    | 1.4  | 1.1  | <b>0.007</b>     | 0.18             |
| PC 14:0-20:5                      | 0.15   | 0.12  | 0.1   | 0.047  | 0.038  | 0.031  | 0.81 | 0.7  | 0.11             | <b>0.017</b>     |
| PC 14:0-22:5 /16:1-20:4/16:0-20:5 | 4.5    | 3.8   | 4     | 1.4    | 1.2    | 1.2    | 0.84 | 0.88 | 0.057            | 0.18             |
| PC 15:0-16:1                      | 0.35   | 0.39  | 0.22  | 0.11   | 0.12   | 0.067  | 1.1  | 0.63 | 0.11             | <b>&lt;0.001</b> |
| PC 15:0-18:1/16:0-17:1            | 0.77   | 0.84  | 0.72  | 0.24   | 0.27   | 0.22   | 1.1  | 0.93 | 0.19             | 0.28             |
| PC 15:0-18:2                      | 1.5    | 1.5   | 1.2   | 0.47   | 0.47   | 0.35   | 1    | 0.8  | 0.84             | 0.0014           |
| PC 15:0-20:4                      | 1.2    | 1.4   | 1.1   | 0.37   | 0.43   | 0.32   | 1.2  | 0.9  | <b>0.0079</b>    | 0.052            |
| PC 15:0-20:5                      | 0.2    | 0.14  | 0.089 | 0.062  | 0.044  | 0.027  | 0.71 | 0.45 | <b>0.023</b>     | <b>&lt;0.001</b> |
| PC 15:0-22:6                      | 0.22   | 0.21  | 0.12  | 0.069  | 0.067  | 0.037  | 0.97 | 0.56 | 0.77             | <b>&lt;0.001</b> |
| PC 16:0-14:0                      | 7.3    | 9.9   | 9     | 2.3    | 3.1    | 2.7    | 1.4  | 1.2  | <b>&lt;0.001</b> | <b>0.0038</b>    |
| PC 16:0-15:0                      | 1.6    | 1.7   | 0.99  | 0.52   | 0.54   | 0.3    | 1    | 0.61 | 0.59             | <b>&lt;0.001</b> |
| PC 16:0-18:0                      | 21     | 26    | 27    | 6.6    | 8.2    | 8.2    | 1.2  | 1.3  | <b>0.00048</b>   | <b>0.0013</b>    |
| PC 16:0-18:2/16:1-18:1            | 33     | 34    | 36    | 11     | 11     | 11     | 1    | 1.1  | 0.61             | 0.052            |
| PC 16:0-22:2                      | 1.6    | 1.2   | 0.99  | 0.51   | 0.38   | 0.3    | 0.73 | 0.61 | <b>&lt;0.001</b> | <b>&lt;0.001</b> |
| PC 16:0e-16:0                     | 2.3    | 2.4   | 2     | 0.73   | 0.75   | 0.6    | 1    | 0.87 | 0.68             | <b>0.047</b>     |

|                                   |      |       |       |       |       |       |      |      |                  |                  |
|-----------------------------------|------|-------|-------|-------|-------|-------|------|------|------------------|------------------|
| PC 16:0e-18:2                     | 0.79 | 0.95  | 0.97  | 0.25  | 0.3   | 0.29  | 1.2  | 1.2  | <b>0.011</b>     | <b>0.022</b>     |
| PC 16:0e-20:2                     | 0.28 | 0.4   | 0.42  | 0.087 | 0.13  | 0.13  | 1.4  | 1.5  | <b>&lt;0.001</b> | <b>&lt;0.001</b> |
| PC 16:0e 20:5                     | 6.5  | 12    | 14    | 2     | 3.7   | 4.2   | 1.8  | 2.1  | <b>&lt;0.001</b> | <b>&lt;0.001</b> |
| PC 16:0e-22:5/18:0e-20:5          | 1.9  | 3.2   | 3.1   | 0.6   | 1     | 0.94  | 1.7  | 1.6  | <b>&lt;0.001</b> | <b>&lt;0.001</b> |
| PC 16:0e-22:6                     | 2.1  | 3.5   | 3.6   | 0.67  | 1.1   | 1.1   | 1.7  | 1.7  | <b>&lt;0.001</b> | <b>&lt;0.001</b> |
| PC 16:0p-16:0                     | 0.36 | 0.57  | 0.54  | 0.11  | 0.18  | 0.16  | 1.6  | 1.5  | <b>&lt;0.001</b> | <b>&lt;0.001</b> |
| PC 16:0p-20:4                     | 6.5  | 12    | 14    | 2     | 3.7   | 4.2   | 1.8  | 2.1  | <b>&lt;0.001</b> | <b>&lt;0.001</b> |
| PC 16:0p-22:6                     | 0.59 | 1.1   | 1.3   | 0.19  | 0.34  | 0.4   | 1.8  | 2.2  | <b>&lt;0.001</b> | <b>&lt;0.001</b> |
| PC 16:1-18:2/16:0-18:3            | 2.3  | 2.1   | 1.8   | 0.73  | 0.66  | 0.54  | 0.9  | 0.78 | 0.39             | 0.074            |
| PC 16:1-18:3/14:0-20:4            | 2.8  | 3     | 2.9   | 0.88  | 0.94  | 0.86  | 1.1  | 1    | 0.38             | 0.77             |
| PC 16:1-20:5                      | 0.83 | 0.68  | 0.56  | 0.26  | 0.21  | 0.17  | 0.82 | 0.67 | 0.086            | <b>0.0038</b>    |
| PC 16:1e-18:1                     | 1.2  | 1.7   | 2.2   | 0.37  | 0.53  | 0.66  | 1.4  | 1.9  | <b>0.014</b>     | <b>&lt;0.001</b> |
| PC 16:1e-20:3                     | 3    | 4.9   | 5.7   | 0.95  | 1.6   | 1.7   | 1.6  | 1.9  | <b>&lt;0.001</b> | <b>&lt;0.001</b> |
| PC 17:0-16:0/18:0-15:0            | 0.87 | 1     | 0.93  | 0.27  | 0.33  | 0.28  | 1.2  | 1.1  | <b>0.019</b>     | 0.35             |
| PC 17:0-18:1 /17:1-18:0/16:0-19:1 | 1.9  | 1.7   | 1.8   | 0.61  | 0.55  | 0.54  | 0.9  | 0.92 | 0.49             | 0.61             |
| PC 17:0-20:3/19:1-18:2            | 0.12 | 0.094 | 0.066 | 0.039 | 0.03  | 0.02  | 0.76 | 0.53 | <b>&lt;0.001</b> | <b>&lt;0.001</b> |
| PC 17:0-20:4                      | 1.4  | 1.2   | 0.97  | 0.43  | 0.39  | 0.29  | 0.9  | 0.71 | 0.15             | <b>&lt;0.001</b> |
| PC 17:0-20:5/17:1-20:4            | 0.76 | 0.69  | 0.57  | 0.24  | 0.22  | 0.17  | 0.9  | 0.75 | 0.071            | <b>&lt;0.001</b> |
| PC 17:0-22:6                      | 0.15 | 0.12  | 0.1   | 0.046 | 0.038 | 0.031 | 0.82 | 0.7  | 0.088            | <b>0.0073</b>    |
| PC 17:1-18:1/17:0-18:2            | 0.99 | 0.92  | 0.8   | 0.31  | 0.29  | 0.24  | 0.93 | 0.81 | 0.32             | <b>0.0065</b>    |
| PC 17:1-18:2                      | 0.62 | 0.54  | 0.48  | 0.19  | 0.17  | 0.14  | 0.88 | 0.78 | 0.11             | <b>0.0035</b>    |
| PC 18:0-18:0                      | 0.37 | 0.45  | 0.77  | 0.12  | 0.14  | 0.23  | 1.2  | 2.1  | 0.3              | <b>&lt;0.001</b> |
| PC 18:0-20:2                      | 8.1  | 6.9   | 6.6   | 2.6   | 2.2   | 2     | 0.85 | 0.82 | 0.27             | 0.2              |



|                                   |       |       |       |       |       |       |      |      |               |               |
|-----------------------------------|-------|-------|-------|-------|-------|-------|------|------|---------------|---------------|
| PC 18:0-20:5                      | 16    | 15    | 14    | 5     | 4.9   | 4.1   | 0.98 | 0.86 | 0.51          | <0.001        |
| PC 18:0-22:5                      | 4.4   | 4.5   | 4.9   | 1.4   | 1.4   | 1.5   | 1    | 1.1  | 0.65          | 0.12          |
| PC 18:0-22:6                      | 4.3   | 3.8   | 4     | 1.4   | 1.2   | 1.2   | 0.89 | 0.94 | 0.23          | 0.52          |
| PC 18:0e-16:0                     | 1.8   | 1.9   | 1.7   | 0.58  | 0.61  | 0.53  | 1.1  | 0.95 | 0.48          | 0.57          |
| PC 18:0e-20:4                     | 1.5   | 2.2   | 2.4   | 0.47  | 0.71  | 0.72  | 1.5  | 1.6  | <0.001        | <0.001        |
| PC 18:0p-18:1/18:1e-18:1          | 0.55  | 0.76  | 0.78  | 0.17  | 0.24  | 0.24  | 1.4  | 1.4  | <0.001        | <0.001        |
| PC 18:0p-20:4                     | 1.9   | 3.3   | 3.7   | 0.59  | 1     | 1.1   | 1.8  | 2    | <0.001        | <0.001        |
| PC 18:0p-22:5                     | 0.66  | 0.8   | 0.83  | 0.21  | 0.25  | 0.25  | 1.2  | 1.3  | <b>0.0044</b> | <b>0.0046</b> |
| PC 18:1-18:1/18:0-18:2            | 39    | 37    | 41    | 12    | 12    | 12    | 0.95 | 1.1  | 0.34          | 0.21          |
| PC 18:1-18:2 /16:0-20:3/18:0-18:3 | 21    | 19    | 19    | 6.6   | 5.9   | 5.7   | 0.88 | 0.91 | <b>0.012</b>  | 0.084         |
| PC 18:1-20:2/18:0-20:3            | 18    | 13    | 11    | 5.7   | 4.3   | 3.4   | 0.74 | 0.61 | <0.001        | <0.001        |
| PC 18:1-20:3                      | 1.6   | 1.6   | 1.3   | 0.5   | 0.49  | 0.41  | 0.98 | 0.85 | 0.71          | <b>0.0011</b> |
| PC 18:1-20:4                      | 3.9   | 3.2   | 2.9   | 1.2   | 1     | 0.87  | 0.82 | 0.75 | <b>0.041</b>  | <b>0.0043</b> |
| PC 18:1-22:0                      | 0.073 | 0.077 | 0.082 | 0.023 | 0.024 | 0.025 | 1    | 1.1  | 0.44          | <b>0.033</b>  |
| PC 18:1-22:6                      | 0.71  | 0.61  | 0.67  | 0.23  | 0.19  | 0.2   | 0.85 | 0.94 | 0.082         | 0.49          |
| PC 18:1e-16:0/18:0e-16:1          | 8.4   | 10    | 8.9   | 2.7   | 3.2   | 2.7   | 1.2  | 1.1  | <b>0.019</b>  | 0.4           |
| PC 18:1e-18:2                     | 0.25  | 0.34  | 0.35  | 0.078 | 0.11  | 0.11  | 1.4  | 1.4  | <0.001        | <0.001        |
| PC 18:1e-20:3                     | 0.45  | 1.2   | 1.5   | 0.14  | 0.36  | 0.46  | 2.5  | 3.4  | <0.001        | <0.001        |
| PC 18:1e-22:6                     | 0.37  | 0.46  | 0.46  | 0.12  | 0.14  | 0.14  | 1.2  | 1.2  | <b>0.0048</b> | <b>0.012</b>  |
| PC 18:2-18:2/18:1-18:3            | 18    | 14    | 13    | 5.6   | 4.3   | 3.8   | 0.78 | 0.72 | <b>0.014</b>  | <b>0.0036</b> |
| PC 18:2-18:3                      | 4.1   | 3.7   | 2.8   | 1.3   | 1.2   | 0.84  | 0.91 | 0.68 | 0.29          | <0.001        |
| PC 18:2-20:4/16:0-22:6            | 30    | 26    | 24    | 9.4   | 8.2   | 7.2   | 0.87 | 0.8  | 0.18          | <b>0.023</b>  |
| PC 18:2-20:5/16:1-22:6            | 3.7   | 2.6   | 1.6   | 1.2   | 0.82  | 0.48  | 0.7  | 0.43 | <b>0.018</b>  | <0.001        |

|                                  |       |       |        |        |        |        |      |      |              |               |
|----------------------------------|-------|-------|--------|--------|--------|--------|------|------|--------------|---------------|
| PC 18:2e-18:1                    | 0.37  | 0.6   | 0.59   | 0.12   | 0.19   | 0.18   | 1.6  | 1.6  | <0.001       | <0.001        |
| PC 19:0-18:1/18:0-19:1           | 0.94  | 0.8   | 0.78   | 0.3    | 0.25   | 0.24   | 0.85 | 0.84 | 0.33         | 0.29          |
| PC 19:0-20:3                     | 0.3   | 0.28  | 0.25   | 0.096  | 0.089  | 0.076  | 0.93 | 0.83 | 0.4          | 0.082         |
| PC 19:0-22:6                     | 0.16  | 0.14  | 0.1    | 0.052  | 0.044  | 0.031  | 0.86 | 0.63 | <b>0.022</b> | <0.001        |
| PC 19:1-18:1/19:0-18:2           | 1.3   | 1.1   | 0.83   | 0.4    | 0.35   | 0.25   | 0.88 | 0.65 | 0.11         | <0.001        |
| PC 20:1-20:3/18:0-22:4           | 2.1   | 3.4   | 3.9    | 0.68   | 1.1    | 1.2    | 1.6  | 1.8  | <0.001       | <0.001        |
| PC 20:2-20:4/18:1-22:5           | 1.6   | 1.5   | 1.7    | 0.51   | 0.48   | 0.5    | 0.94 | 1    | 0.6          | 0.76          |
| PC 20:3-20:4                     | 2.6   | 2     | 1.9    | 0.83   | 0.62   | 0.58   | 0.74 | 0.73 | <0.001       | <0.001        |
| PC 20:4-20:4                     | 5.6   | 4.7   | 4.2    | 1.8    | 1.5    | 1.3    | 0.84 | 0.75 | <b>0.023</b> | <b>0.0011</b> |
| PE 14:0-18:2                     | 0.087 | 0.076 | 0.061  | 0.027  | 0.024  | 0.018  | 0.87 | 0.7  | 0.2          | <b>0.003</b>  |
| PE 15:0-18:1                     | 0.014 | 0.013 | 0.0078 | 0.0043 | 0.0042 | 0.0023 | 0.97 | 0.57 | 0.69         | <0.001        |
| PE 16:1-18:2                     | 0.027 | 0.029 | 0.024  | 0.0085 | 0.0092 | 0.0071 | 1.1  | 0.88 | 0.47         | 0.26          |
| PE 16:0-16:0                     | 0.14  | 0.13  | 0.11   | 0.044  | 0.041  | 0.033  | 0.95 | 0.8  | 0.55         | <b>0.011</b>  |
| PE 16:0-16:1/14:0-18:1           | 0.34  | 0.35  | 0.36   | 0.11   | 0.11   | 0.11   | 1    | 1.1  | 0.77         | 0.55          |
| PE 16:0-18:0                     | 0.14  | 0.18  | 0.19   | 0.043  | 0.058  | 0.056  | 1.3  | 1.4  | <0.001       | <0.001        |
| PE 16:0-18:1                     | 1.9   | 1.6   | 1.2    | 0.61   | 0.5    | 0.36   | 0.82 | 0.62 | <b>0.024</b> | <0.001        |
| PE 16:0-18:3                     | 0.018 | 0.018 | 0.014  | 0.0055 | 0.0056 | 0.0043 | 1    | 0.81 | 0.94         | 0.27          |
| PE 16:0-20:1/18:0-18:1           | 3.2   | 3.3   | 3.3    | 1      | 1      | 1      | 1    | 1    | 0.95         | 0.77          |
| PE 16:0-20:4                     | 5     | 4.1   | 3.2    | 1.6    | 1.3    | 0.96   | 0.81 | 0.63 | <0.001       | <0.001        |
| PE 16:0-20:5                     | 0.099 | 0.014 | 0.028  | 0.031  | 0.0044 | 0.0085 | 0.14 | 0.29 | 0.08         | 0.14          |
| PE 16:0-22:4                     | 0.35  | 0.24  | 0.18   | 0.11   | 0.077  | 0.055  | 0.7  | 0.53 | <0.001       | <0.001        |
| PE 16:0-22:6/16:1-22:5/20:2-18:4 | 1.9   | 1.9   | 1.6    | 0.6    | 0.61   | 0.47   | 1    | 0.83 | 0.79         | 0.054         |
| PE 16:0e-18:1                    | 0.14  | 0.12  | 0.14   | 0.043  | 0.038  | 0.043  | 0.88 | 1    | 0.24         | 0.7           |

|                          |       |        |        |        |       |        |      |      |                |                |
|--------------------------|-------|--------|--------|--------|-------|--------|------|------|----------------|----------------|
| PE16:0p-18:1             | 0.082 | 0.097  | 0.1    | 0.026  | 0.031 | 0.031  | 1.2  | 1.2  | <b>0.014</b>   | <b>0.0011</b>  |
| PE 16:0p-20:3/16:0e-20:4 | 0.3   | 0.35   | 0.45   | 0.096  | 0.11  | 0.14   | 1.2  | 1.5  | 0.12           | < <b>0.001</b> |
| PE 16:0p-20:4            | 0.5   | 0.51   | 0.57   | 0.16   | 0.16  | 0.17   | 1    | 1.1  | 0.5            | <b>0.014</b>   |
| PE 16:0p-20:5            | 0.04  | 0.035  | 0.053  | 0.013  | 0.011 | 0.016  | 0.86 | 1.3  | 0.23           | <b>0.047</b>   |
| PE 16:0p-22:6            | 0.062 | 0.061  | 0.059  | 0.02   | 0.019 | 0.018  | 0.98 | 0.95 | 0.78           | 0.45           |
| PE 16:1-18:1/16:0-18:2   | 1.7   | 1.3    | 0.81   | 0.53   | 0.42  | 0.24   | 0.78 | 0.48 | <b>0.0059</b>  | < <b>0.001</b> |
| PE 16:1-18:2             | 0.27  | 0.2    | 0.12   | 0.084  | 0.063 | 0.035  | 0.74 | 0.43 | <b>0.02</b>    | < <b>0.001</b> |
| PE 16:1-20:5             | 0.11  | 0.069  | 0.033  | 0.034  | 0.022 | 0.01   | 0.63 | 0.31 | < <b>0.001</b> | < <b>0.001</b> |
| PE 16:1-22:6/18:2-20:5   | 0.59  | 0.38   | 0.16   | 0.19   | 0.12  | 0.047  | 0.64 | 0.27 | < <b>0.001</b> | < <b>0.001</b> |
| PE 17:0-18:1             | 0.1   | 0.084  | 0.079  | 0.032  | 0.026 | 0.024  | 0.82 | 0.77 | 0.13           | 0.071          |
| PE 17:0-18:2             | 0.098 | 0.073  | 0.038  | 0.031  | 0.023 | 0.012  | 0.74 | 0.39 | <b>0.0038</b>  | < <b>0.001</b> |
| PE 17:0-20:4             | 0.31  | 0.24   | 0.15   | 0.097  | 0.075 | 0.045  | 0.78 | 0.49 | <b>0.0017</b>  | < <b>0.001</b> |
| PE 17:0-22:5             | 0.01  | 0.0095 | 0.0052 | 0.0032 | 0.003 | 0.0016 | 0.93 | 0.51 | 0.62           | < <b>0.001</b> |
| PE 17:1-18:2             | 0.047 | 0.034  | 0.03   | 0.015  | 0.011 | 0.0091 | 0.72 | 0.65 | <b>0.019</b>   | <b>0.02</b>    |
| PE 17:1-20:4             | 0.096 | 0.067  | 0.068  | 0.03   | 0.021 | 0.02   | 0.7  | 0.71 | <b>0.048</b>   | 0.068          |
| PE 18:0-20:1             | 0.24  | 0.21   | 0.28   | 0.075  | 0.068 | 0.086  | 0.91 | 1.2  | 0.72           | 0.49           |
| PE 18:0-20:3             | 0.82  | 0.59   | 0.35   | 0.26   | 0.19  | 0.1    | 0.72 | 0.42 | < <b>0.001</b> | < <b>0.001</b> |
| PE 18:0-20:4             | 9.3   | 8.1    | 6.5    | 2.9    | 2.6   | 2      | 0.88 | 0.7  | 0.056          | < <b>0.001</b> |
| PE 18:0-20:5             | 4.6   | 3.3    | 2.4    | 1.5    | 1     | 0.72   | 0.72 | 0.52 | < <b>0.001</b> | < <b>0.001</b> |
| PE 18:0-22:4/20:0-20:4   | 0.96  | 1.1    | 1.1    | 0.3    | 0.33  | 0.33   | 1.1  | 1.2  | 0.19           | 0.07           |
| PE 18:0-22:5             | 0.34  | 0.36   | 0.37   | 0.11   | 0.11  | 0.11   | 1.1  | 1.1  | 0.37           | 0.23           |
| PE 18:0-22:6             | 0.21  | 0.24   | 0.23   | 0.065  | 0.075 | 0.069  | 1.2  | 1.1  | 0.15           | 0.15           |
| PE 18:0e-18:1            | 0.14  | 0.13   | 0.13   | 0.045  | 0.04  | 0.039  | 0.89 | 0.91 | 0.41           | 0.6            |

|                                      |       |       |       |        |        |        |      |      |                  |                  |
|--------------------------------------|-------|-------|-------|--------|--------|--------|------|------|------------------|------------------|
| PE 18:0e-18:2                        | 0.15  | 0.13  | 0.12  | 0.048  | 0.04   | 0.036  | 0.85 | 0.8  | 0.31             | 0.16             |
| PE 18:0p-18:1                        | 0.13  | 0.13  | 0.15  | 0.042  | 0.04   | 0.044  | 0.95 | 1.1  | 0.83             | 0.58             |
| PE 18:0p-20:4                        | 0.73  | 0.75  | 0.81  | 0.23   | 0.24   | 0.24   | 1    | 1.1  | 0.4              | <b>0.017</b>     |
| PE 18:0p-20:5 /18:1p-20:4/16:0e-22:6 | 0.38  | 0.37  | 0.35  | 0.12   | 0.12   | 0.11   | 0.97 | 0.92 | 0.65             | 0.29             |
| PE 18:0p-22:5/18:1p-22:4             | 0.077 | 0.077 | 0.092 | 0.024  | 0.024  | 0.028  | 1    | 1.2  | 0.94             | <b>0.029</b>     |
| PE 18:0p-22:6/18:1p-22:5             | 0.047 | 0.045 | 0.048 | 0.015  | 0.014  | 0.015  | 0.96 | 1    | 0.67             | 0.75             |
| PE 18:1-18:1/18:0-18:2               | 3.2   | 2.4   | 2     | 1      | 0.77   | 0.61   | 0.77 | 0.64 | <b>&lt;0.001</b> | <b>&lt;0.001</b> |
| PE 18:1-18:2                         | 2.6   | 1.9   | 1.1   | 0.81   | 0.59   | 0.35   | 0.73 | 0.45 | <b>&lt;0.001</b> | <b>&lt;0.001</b> |
| PE 18:1-20:1                         | 0.079 | 0.053 | 0.03  | 0.025  | 0.017  | 0.0091 | 0.68 | 0.38 | <b>0.0017</b>    | <b>&lt;0.001</b> |
| PE 18:1-20:3/18:2-20:2               | 7.3   | 8.1   | 5.9   | 2.3    | 2.6    | 1.8    | 1.1  | 0.8  | 0.55             | 0.3              |
| PE 18:1-20:4                         | 4.6   | 3.3   | 2.4   | 1.5    | 1      | 0.72   | 0.72 | 0.51 | <b>&lt;0.001</b> | <b>&lt;0.001</b> |
| PE 18:1-22:5                         | 0.063 | 0.059 | 0.054 | 0.02   | 0.019  | 0.016  | 0.93 | 0.85 | 0.39             | 0.078            |
| PE 18:1-22:6                         | 0.11  | 0.11  | 0.078 | 0.034  | 0.035  | 0.024  | 1    | 0.74 | 0.76             | <b>&lt;0.001</b> |
| PE 18:1e-20:3                        | 0.38  | 0.41  | 0.48  | 0.12   | 0.13   | 0.14   | 1.1  | 1.3  | 0.33             | <b>0.0081</b>    |
| PE 18:1p-18:1/18:0p-18:2/18:0e-18:3  | 0.091 | 0.1   | 0.086 | 0.029  | 0.032  | 0.026  | 1.1  | 0.94 | 0.3              | 0.43             |
| PE 18:1p-20:3/16:0p-22:4             | 0.15  | 0.18  | 0.2   | 0.048  | 0.055  | 0.061  | 1.2  | 1.3  | 0.11             | <b>0.0092</b>    |
| PE 18:2-18:2                         | 5     | 4.1   | 3.2   | 1.6    | 1.3    | 0.96   | 0.81 | 0.63 | <b>&lt;0.001</b> | <b>&lt;0.001</b> |
| PE 18:2-18:3                         | 1.4   | 1     | 0.65  | 0.44   | 0.32   | 0.2    | 0.73 | 0.47 | <b>0.025</b>     | <b>&lt;0.001</b> |
| PE 19:0-18:2                         | 0.046 | 0.036 | 0.02  | 0.015  | 0.011  | 0.0062 | 0.78 | 0.44 | 0.05             | <b>&lt;0.001</b> |
| PE 19:0-20:4                         | 0.13  | 0.12  | 0.076 | 0.042  | 0.038  | 0.023  | 0.91 | 0.58 | 0.32             | <b>&lt;0.001</b> |
| PE 20:0-18:2                         | 0.4   | 0.36  | 0.29  | 0.13   | 0.11   | 0.089  | 0.88 | 0.73 | 0.16             | <b>0.0017</b>    |
| PE 20:0e-18:1                        | 0.017 | 0.017 | 0.012 | 0.0053 | 0.0055 | 0.0037 | 1    | 0.73 | 0.72             | <b>0.0075</b>    |
| PE 20:0e-20:4/18:0e-22:4             | 0.017 | 0.012 | 0.019 | 0.0053 | 0.0038 | 0.0056 | 0.72 | 1.1  | 0.32             | 0.84             |

|              |      |      |      |       |       |       |      |      |              |                  |
|--------------|------|------|------|-------|-------|-------|------|------|--------------|------------------|
| PE 20:1-18:2 | 0.95 | 0.83 | 0.69 | 0.3   | 0.26  | 0.21  | 0.87 | 0.72 | <b>0.029</b> | <b>&lt;0.001</b> |
| PE 22:1-20:4 | 0.12 | 0.14 | 0.11 | 0.037 | 0.044 | 0.034 | 1.2  | 0.98 | <b>0.016</b> | 0.72             |

The metabolite profiles of kidney tissues were measured by GC/MS- (A) and LC/MS- (B) based metabolomics approaches. The levels of each metabolite were normalized with the peak intensity of the internal standard; 2-isopropylmalic acid (for GC/MS) or PC 12:0-12:0 (for LC/MS), and the tissue weight. The fold-change values were calculated with the ratio of the treatment group to the non-treatment group. *P* values were calculated by the Welch's t-test. In the column of 'P value', the bold letters show  $P < 0.05$ .

**Abbreviations:** Non, non-treatment group; Low, low-dose group; High, high-dose group; LPC, lysophosphatidylcholine; PC, phosphatidylcholine; LPE, lysophosphatidylethanolamine; PE, phosphatidylethanolamine; FA, fatty acid; AC, acylcarnitine.
