# Supplementary material for: Metabolomics for the early detection of cisplatin-induced nephrotoxicity
Source: Royal Society of Chemistry journal article supplement (doi:10.1039/c7tx00171a), 2017-01-01
Supplement: c7tx00171a5.pdf [file c7tx00171a5.pdf]

**Supplemental Table 5. Correlation between metabolite biomarker candidates and plasma creatinine**

**A**

| Name               | Time  | Pearson Correlation |                  | Spearman Correlation |                  |
|--------------------|-------|---------------------|------------------|----------------------|------------------|
|                    |       | Correlation         | <i>P</i> value   | Correlation          | <i>P</i> value   |
| 3-Hydroxy-butyrate | 24 hr | 0.5                 | <b>0.0041</b>    | 0.63                 | <b>&lt;0.001</b> |
|                    | 48 hr | 0.57                | <b>&lt;0.001</b> | 0.78                 | <b>&lt;0.001</b> |
|                    | 96 hr | 0.49                | <b>0.0051</b>    | 0.47                 | <b>0.01</b>      |
| Cysteine+Cystine   | 24 hr | -0.58               | <b>&lt;0.001</b> | -0.58                | <b>0.0014</b>    |
|                    | 48 hr | -0.56               | <b>&lt;0.001</b> | -0.57                | <b>0.0018</b>    |
|                    | 96 hr | -0.32               | 0.08             | -0.47                | <b>0.01</b>      |

**B**

| Name         | Time  | Pearson Correlation |                  | Spearman Correlation |                  |
|--------------|-------|---------------------|------------------|----------------------|------------------|
|              |       | Correlation         | <i>P</i> value   | Correlation          | <i>P</i> value   |
| AC 14:0      | 24 hr | 0.75                | <b>&lt;0.001</b> | 0.79                 | <b>&lt;0.001</b> |
|              | 48 hr | 0.74                | <b>&lt;0.001</b> | 0.73                 | <b>&lt;0.001</b> |
|              | 96 hr | 0.68                | <b>&lt;0.001</b> | 0.63                 | <b>&lt;0.001</b> |
| AC 18:1      | 24 hr | 0.74                | <b>&lt;0.001</b> | 0.72                 | <b>&lt;0.001</b> |
|              | 48 hr | 0.85                | <b>&lt;0.001</b> | 0.86                 | <b>&lt;0.001</b> |
|              | 96 hr | 0.83                | <b>&lt;0.001</b> | 0.76                 | <b>&lt;0.001</b> |
| AC 18:2      | 24 hr | 0.66                | <b>&lt;0.001</b> | 0.68                 | <b>&lt;0.001</b> |
|              | 48 hr | 0.83                | <b>&lt;0.001</b> | 0.83                 | <b>&lt;0.001</b> |
|              | 96 hr | 0.77                | <b>&lt;0.001</b> | 0.78                 | <b>&lt;0.001</b> |
| PE 18:2-18:2 | 24 hr | -0.49               | <b>&lt;0.001</b> | -0.54                | <b>&lt;0.001</b> |
|              | 48 hr | -0.6                | <b>&lt;0.001</b> | -0.53                | <b>&lt;0.001</b> |
|              | 96 hr | -0.37               | <b>0.041</b>     | -0.33                | 0.067            |

Correlations were evaluated by using Pearson's product-moment correlation coefficient test and Spearman's rank correlation coefficient between plasma metabolite candidates selected from GC/MS (**A**) and LC/MS (**B**) at each time and plasma creatinine at 96 hr. *P* values were calculated by the Welch's *t* test. In the column of 'P value', the bold letters show  $P < 0.05$ .

**Abbreviations:** PE, phosphatidylethanolamine; AC, acylcarnitine.
