# Supplementary material for: Metabolomics for the early detection of cisplatin-induced nephrotoxicity
Source: Royal Society of Chemistry journal article supplement (doi:10.1039/c7tx00171a), 2017-01-01
Supplement: c7tx00171a6.pdf [file c7tx00171a6.pdf]

## Supplemental Figure 1.

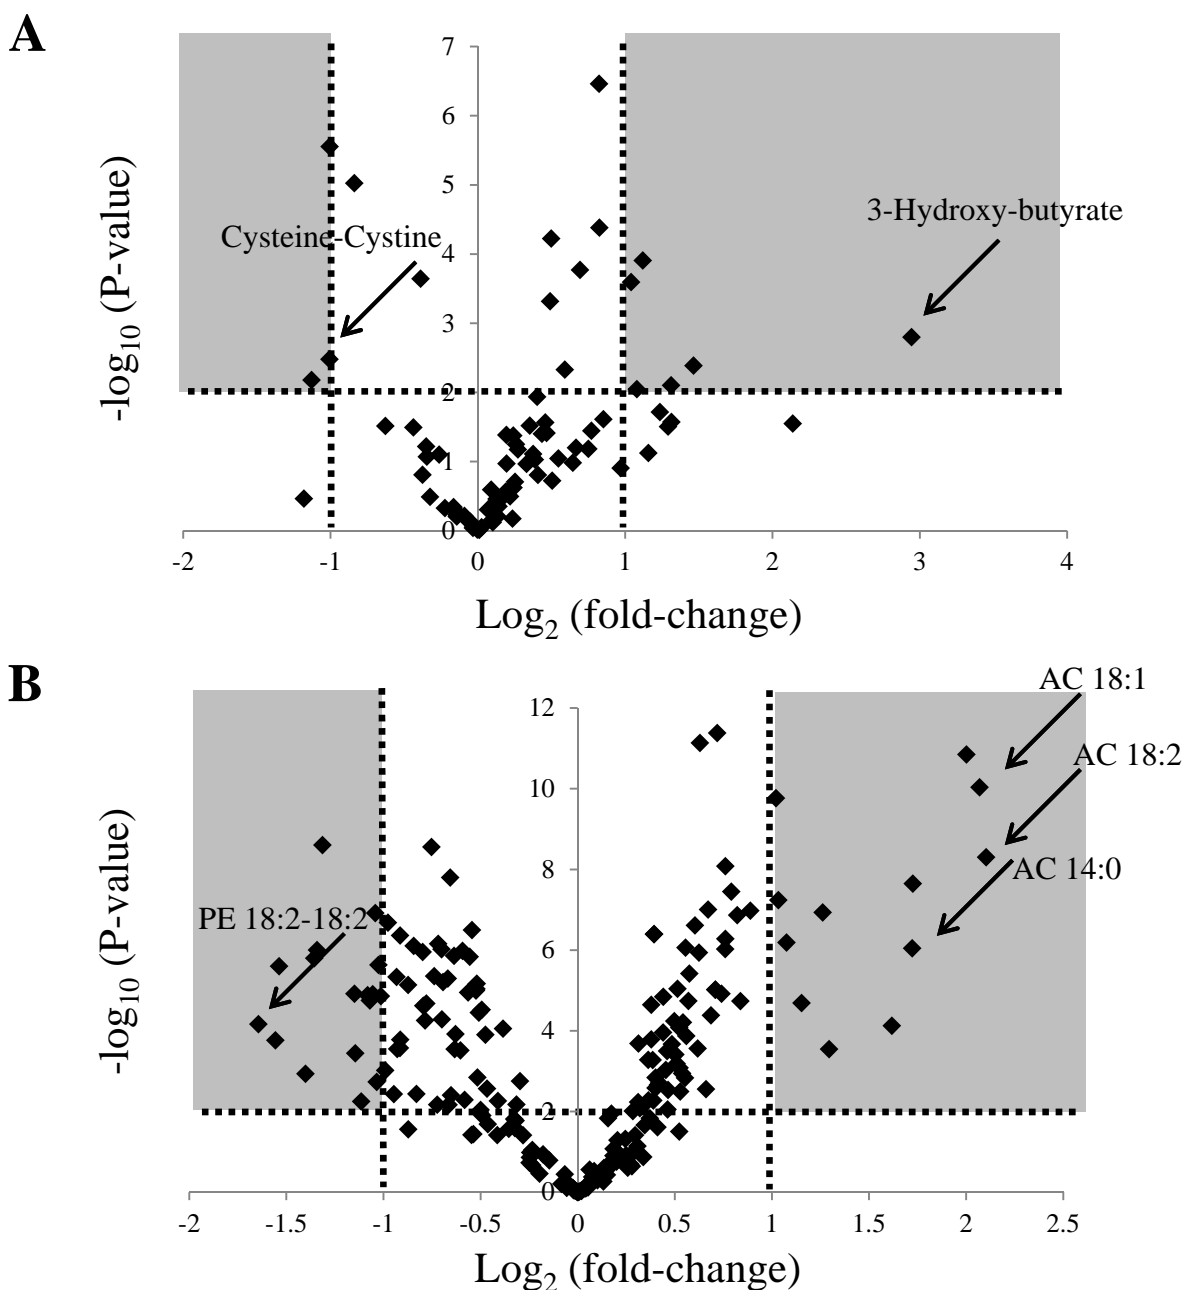

### Supplemental Figure 1. Candidate biomarkers of nephrotoxicity selected by volcano plot analysis of the plasma metabolite data obtained using GC/MS or LC/MS in the high-dose group at 48 hr after the injection of cisplatin

The volcano plot analysis shows the changes in the metabolite data obtained using GC/MS (**A**) or LC/MS (**B**) at 48 hr after the administration of 10 mg/kgBW cisplatin (in the high-dose group). The volcano plot shows P-values on the y-axis and fold-change values on the x-axis. The P-values (compared with the control group) were calculated using Welch's t test. The fold-change values represent ratios of the value for the relevant treatment group to the value for the untreated group. The arrows indicate the 6 candidate biomarkers that were selected based on the volcano plot. The horizontal red line indicates  $P=0.01$ , the vertical red line indicates a fold-change of 2 or 0.5, and the yellow zones indicate P-values of  $<0.01$  and fold-change values of  $>2$  or  $<0.5$ .
